# Supplementary material for: Evidence-Based Recommendations for an Optimal Prenatal Supplement for Women in the U.S., Part Two: Minerals
Source: MDPI journal article supplement (doi:10.3390/nu13061849), 2021-05-28
Supplement: s1 [file s1]

**Supplemental Table S1: Additional information about research studies discussed**

| Mineral(s)<br>Reviewed | Reference                   | Country                  | Number of<br>Participants | Study<br>Type | Link                                                                                                                                                                                                                                                                  |
|------------------------|-----------------------------|--------------------------|---------------------------|---------------|-----------------------------------------------------------------------------------------------------------------------------------------------------------------------------------------------------------------------------------------------------------------------|
| Calcium                | Lerch 2007                  | Turkey,<br>China, France | 1700                      | O             | <a href="https://pubmed.ncbi.nlm.nih.gov/17943890/">https://pubmed.ncbi.nlm.nih.gov/17943890/</a>                                                                                                                                                                     |
| Calcium                | Pettifor 2008               |                          |                           | R             | <a href="https://pubmed.ncbi.nlm.nih.gov/29450091/">https://pubmed.ncbi.nlm.nih.gov/29450091/</a>                                                                                                                                                                     |
| Calcium                | Wallis 2008                 | US                       | 871856                    | O             | <a href="https://pubmed.ncbi.nlm.nih.gov/18437143/">https://pubmed.ncbi.nlm.nih.gov/18437143/</a>                                                                                                                                                                     |
| Calcium                | Pitkin 1997                 | US                       | 184                       | O             | <a href="https://pubmed.ncbi.nlm.nih.gov/848531/">https://pubmed.ncbi.nlm.nih.gov/848531/</a>                                                                                                                                                                         |
| Calcium                | Almaghamsi<br>2018          |                          |                           | R             | <a href="https://pubmed.ncbi.nlm.nih.gov/30410686/">https://pubmed.ncbi.nlm.nih.gov/30410686/</a>                                                                                                                                                                     |
| Calcium                | Kolthoff 1998               | Croatia                  | 59                        | T             | <a href="https://pubmed.ncbi.nlm.nih.gov/9640346/">https://pubmed.ncbi.nlm.nih.gov/9640346/</a>                                                                                                                                                                       |
| Calcium                | He 2016                     |                          | 14 studies                | M             | <a href="https://pubmed.ncbi.nlm.nih.gov/26930501/">https://pubmed.ncbi.nlm.nih.gov/26930501/</a>                                                                                                                                                                     |
| Calcium                | Hofmeyr 2014                | Worldwide                | 18064                     | T             | <a href="https://pubmed.ncbi.nlm.nih.gov/30277579/">https://pubmed.ncbi.nlm.nih.gov/30277579/</a>                                                                                                                                                                     |
| Calcium                | Herrera 2005                | Bangladesh,<br>Colombia  | 48                        | T             | <a href="https://pubmed.ncbi.nlm.nih.gov/16243339/">https://pubmed.ncbi.nlm.nih.gov/16243339/</a>                                                                                                                                                                     |
| Calcium                | Herrera 1998                | Colombia                 | 86                        | T             | <a href="https://pubmed.ncbi.nlm.nih.gov/9540946/">https://pubmed.ncbi.nlm.nih.gov/9540946/</a>                                                                                                                                                                       |
| Calcium                | Mann 2010                   | US                       | 87677                     | O             | <a href="https://pubmed.ncbi.nlm.nih.gov/19936906/">https://pubmed.ncbi.nlm.nih.gov/19936906/</a>                                                                                                                                                                     |
| Calcium                | Li 2018                     | China                    | 728                       | O/T           | <a href="https://pubmed.ncbi.nlm.nih.gov/30593205/">https://pubmed.ncbi.nlm.nih.gov/30593205/</a>                                                                                                                                                                     |
| Calcium                | Bassaw 1998                 | Trinidad                 | 510                       | T             | <a href="https://pubmed.ncbi.nlm.nih.gov/15512028/">https://pubmed.ncbi.nlm.nih.gov/15512028/</a>                                                                                                                                                                     |
| Calcium                | Rogers 1999                 | China                    | 500                       | T             | <a href="https://pubmed.ncbi.nlm.nih.gov/10476618/">https://pubmed.ncbi.nlm.nih.gov/10476618/</a>                                                                                                                                                                     |
| Calcium                | Cong 1995                   | China                    | 212                       | T             | <a href="https://pubmed.ncbi.nlm.nih.gov/7712843/">https://pubmed.ncbi.nlm.nih.gov/7712843/</a>                                                                                                                                                                       |
| Calcium                | World 2011                  |                          |                           | R             | <a href="https://pubmed.ncbi.nlm.nih.gov/23741776/">https://pubmed.ncbi.nlm.nih.gov/23741776/</a>                                                                                                                                                                     |
| Chromium               | Aharoni 1992                | US                       | 110                       | O             | <a href="https://pubmed.ncbi.nlm.nih.gov/1728809/">https://pubmed.ncbi.nlm.nih.gov/1728809/</a>                                                                                                                                                                       |
| Chromium               | Hambidge 1969               | US                       | 21                        | O             | <a href="https://pubmed.ncbi.nlm.nih.gov/5763119/">https://pubmed.ncbi.nlm.nih.gov/5763119/</a>                                                                                                                                                                       |
| Chromium               | Mahalko 1976                | US                       | 78                        | O             | <a href="https://pubmed.ncbi.nlm.nih.gov/973597/">https://pubmed.ncbi.nlm.nih.gov/973597/</a>                                                                                                                                                                         |
| Chromium               | Afridi 2009                 | Pakistan                 | 144                       | O             | <a href="https://pubmed.ncbi.nlm.nih.gov/19169697/">https://pubmed.ncbi.nlm.nih.gov/19169697/</a>                                                                                                                                                                     |
| Chromium               | Sundararaman<br>2012        | India                    | 30                        | O             | <a href="https://pubmed.ncbi.nlm.nih.gov/22701850/">https://pubmed.ncbi.nlm.nih.gov/22701850/</a>                                                                                                                                                                     |
| Chromium               | Woods 2008                  | US                       | 425                       | O             | <a href="https://pubmed.ncbi.nlm.nih.gov/18343864/">https://pubmed.ncbi.nlm.nih.gov/18343864/</a>                                                                                                                                                                     |
| Chromium               | Jovanovic-<br>Peterson 1996 | US                       | 24                        | T             | <a href="https://pubmed.ncbi.nlm.nih.gov/8632110/">https://pubmed.ncbi.nlm.nih.gov/8632110/</a>                                                                                                                                                                       |
| Chromium               | Jamilian 2016               | Iran                     | 60                        | T             | <a href="https://pubmed.ncbi.nlm.nih.gov/26613790/">https://pubmed.ncbi.nlm.nih.gov/26613790/</a>                                                                                                                                                                     |
| Chromium               | Amiri<br>Siavashani<br>2018 | Iran                     | 40                        | T             | <a href="https://pubmed.ncbi.nlm.nih.gov/30546347/">https://pubmed.ncbi.nlm.nih.gov/30546347/</a>                                                                                                                                                                     |
| Chromium               | Suksomboon<br>2014          |                          | 1498                      | M             | <a href="https://pubmed.ncbi.nlm.nih.gov/24635480/">https://pubmed.ncbi.nlm.nih.gov/24635480/</a>                                                                                                                                                                     |
| Chromium               | Iovieno 2011                | US                       |                           | R             | <a href="https://pubmed.ncbi.nlm.nih.gov/20579741/">https://pubmed.ncbi.nlm.nih.gov/20579741/</a>                                                                                                                                                                     |
| Copper                 | Alebic-Juretic<br>2005      | Croatia                  | 319                       | O             | <a href="https://pubmed.ncbi.nlm.nih.gov/16325535/">https://pubmed.ncbi.nlm.nih.gov/16325535/</a>                                                                                                                                                                     |
| Copper                 | Vukelic 2012                | Serbia                   | 2170                      | O             | <a href="https://pubmed.ncbi.nlm.nih.gov/22462346/">https://pubmed.ncbi.nlm.nih.gov/22462346/</a>                                                                                                                                                                     |
| Copper                 | Buamah 1984                 |                          | 259                       | O             | <a href="https://pubmed.ncbi.nlm.nih.gov/6478599/">https://pubmed.ncbi.nlm.nih.gov/6478599/</a>                                                                                                                                                                       |
| Copper                 | Morton 1976                 | South Wales              | 20                        | O             | <a href="https://pubmed.ncbi.nlm.nih.gov/949571/">https://pubmed.ncbi.nlm.nih.gov/949571/</a>                                                                                                                                                                         |
| Copper                 | Zhang 2006                  | Europe                   | 100                       | O             | <a href="https://europepmc.org/article/med/16635319">https://europepmc.org/article/med/16635319</a>                                                                                                                                                                   |
| Copper                 | Song 2017                   |                          | 1360                      | M             | <a href="https://pubmed.ncbi.nlm.nih.gov/28385285/">https://pubmed.ncbi.nlm.nih.gov/28385285/</a>                                                                                                                                                                     |
| Copper                 | Fan 2016                    |                          | 905                       | M             | <a href="https://pubmed.ncbi.nlm.nih.gov/27407173/">https://pubmed.ncbi.nlm.nih.gov/27407173/</a>                                                                                                                                                                     |
| Copper                 | Thauvin 1992                | France                   | 62                        | T             | <a href="https://pubmed.ncbi.nlm.nih.gov/1375082/">https://pubmed.ncbi.nlm.nih.gov/1375082/</a>                                                                                                                                                                       |
| Iodine                 | Borekci 2009                | Turkey                   | 40                        | O             | <a href="https://pubmed.ncbi.nlm.nih.gov/19034391/">https://pubmed.ncbi.nlm.nih.gov/19034391/</a>                                                                                                                                                                     |
| Iodine                 | Adams 2006                  | US                       | 145                       | O             | <a href="https://pubmed.ncbi.nlm.nih.gov/16845157/">https://pubmed.ncbi.nlm.nih.gov/16845157/</a>                                                                                                                                                                     |
| Iodine                 | Adams 2011                  | US                       | 99                        | O             | <a href="https://pubmed.ncbi.nlm.nih.gov/21651783/">https://pubmed.ncbi.nlm.nih.gov/21651783/</a>                                                                                                                                                                     |
| Iodine                 | de Escobar<br>2007          |                          |                           | R             | <a href="https://pubmed.ncbi.nlm.nih.gov/18053280/">https://pubmed.ncbi.nlm.nih.gov/18053280/</a>                                                                                                                                                                     |
| Iodine                 | de Benoist                  |                          |                           | R             | <a href="https://pubmed.ncbi.nlm.nih.gov/18947032/">https://pubmed.ncbi.nlm.nih.gov/18947032/</a>                                                                                                                                                                     |
| Iodine                 | Leung 2012                  |                          |                           | R             | <a href="https://pubmed.ncbi.nlm.nih.gov/?term=Leung%2C+2012%2C+History+of+U.S.+iodine+fortification+and+supplementation&amp;filter=">https://pubmed.ncbi.nlm.nih.gov/?term=Leung%2C+2012%2C+History+of+U.S.+iodine+fortification+and+supplementation&amp;filter=</a> |

|           |                   |                              |            |     |                                                                                                   |
|-----------|-------------------|------------------------------|------------|-----|---------------------------------------------------------------------------------------------------|
|           |                   |                              |            |     | <a href="#">simsearch3.fft</a>                                                                    |
| Iodine    | Hollowell 1998    | US                           | 62818      | O   | <a href="https://pubmed.ncbi.nlm.nih.gov/9768638/">https://pubmed.ncbi.nlm.nih.gov/9768638/</a>   |
| Iodine    | Caldwell 2013     | US                           | 501        | O   | <a href="https://pubmed.ncbi.nlm.nih.gov/23488982/">https://pubmed.ncbi.nlm.nih.gov/23488982/</a> |
| Iodine    | Glinoe 1997       |                              |            | R   | <a href="https://pubmed.ncbi.nlm.nih.gov/9183570/">https://pubmed.ncbi.nlm.nih.gov/9183570/</a>   |
| Iodine    | Lieberman 1998    | Chile                        | 16         | O   | <a href="https://pubmed.ncbi.nlm.nih.gov/9768662/">https://pubmed.ncbi.nlm.nih.gov/9768662/</a>   |
| Iodine    | Brander 2003      | Switzerland                  | 316        | O   | <a href="https://pubmed.ncbi.nlm.nih.gov/12906364/">https://pubmed.ncbi.nlm.nih.gov/12906364/</a> |
| Iodine    | Alexander 2017    |                              |            | R   | <a href="https://pubmed.ncbi.nlm.nih.gov/28056690/">https://pubmed.ncbi.nlm.nih.gov/28056690/</a> |
| Iodine    | Delange 2007      |                              |            | R   | <a href="https://pubmed.ncbi.nlm.nih.gov/18053281/">https://pubmed.ncbi.nlm.nih.gov/18053281/</a> |
| Iodine    | Berbel 2009       | Spain                        | 345        | O   | <a href="https://pubmed.ncbi.nlm.nih.gov/19348584/">https://pubmed.ncbi.nlm.nih.gov/19348584/</a> |
| Iodine    | O'Donnell 2002    | China                        | 207        | O   | <a href="https://pubmed.ncbi.nlm.nih.gov/11848114/">https://pubmed.ncbi.nlm.nih.gov/11848114/</a> |
| Iodine    | Delange 2005      |                              |            | R   | <a href="https://pubmed.ncbi.nlm.nih.gov/16398455/">https://pubmed.ncbi.nlm.nih.gov/16398455/</a> |
| Iodine    | Moreno-Reyes 2013 | Belgium                      | 1311       | O   | <a href="https://pubmed.ncbi.nlm.nih.gov/23846819/">https://pubmed.ncbi.nlm.nih.gov/23846819/</a> |
| Iodine    | Vermiglio 2004    | Italy                        | 27         | O   | <a href="https://pubmed.ncbi.nlm.nih.gov/15579758/">https://pubmed.ncbi.nlm.nih.gov/15579758/</a> |
| Iodine    | Bath 2013         | UK                           | 1040       | O   | <a href="https://pubmed.ncbi.nlm.nih.gov/23706508/">https://pubmed.ncbi.nlm.nih.gov/23706508/</a> |
| Iodine    | Hynes 2013        | Australia                    | 228        | O   | <a href="https://pubmed.ncbi.nlm.nih.gov/23633204/">https://pubmed.ncbi.nlm.nih.gov/23633204/</a> |
| Iodine    | van Mil 2012      | Netherlands                  | 1156       | O   | <a href="https://pubmed.ncbi.nlm.nih.gov/23077186/">https://pubmed.ncbi.nlm.nih.gov/23077186/</a> |
| Iodine    | Levie 2018        | Spain,<br>Netherlands,<br>UK | 9036       | M   | <a href="https://pubmed.ncbi.nlm.nih.gov/29757392/">https://pubmed.ncbi.nlm.nih.gov/29757392/</a> |
| Iodine    | Dineva 2020       |                              | 37 studies | R/M | <a href="https://pubmed.ncbi.nlm.nih.gov/32320029/">https://pubmed.ncbi.nlm.nih.gov/32320029/</a> |
| Iodine    | Drover 2019       |                              | 28 studies | R   | <a href="https://pubmed.ncbi.nlm.nih.gov/30299402/">https://pubmed.ncbi.nlm.nih.gov/30299402/</a> |
| Iodine    | Borekci 2009      | Turkey                       | 40         | O   | <a href="https://pubmed.ncbi.nlm.nih.gov/19034391/">https://pubmed.ncbi.nlm.nih.gov/19034391/</a> |
| Iodine    | Censi 2019        | Italy                        | 90         | T   | <a href="https://pubmed.ncbi.nlm.nih.gov/31689890/">https://pubmed.ncbi.nlm.nih.gov/31689890/</a> |
| Iodine    | Antonangeli 2002  | Italy                        | 67         | T   | <a href="https://pubmed.ncbi.nlm.nih.gov/12088916/">https://pubmed.ncbi.nlm.nih.gov/12088916/</a> |
| Iodine    | Markhus 2018      | Norway                       | 851        | O   | <a href="https://pubmed.ncbi.nlm.nih.gov/30205599/">https://pubmed.ncbi.nlm.nih.gov/30205599/</a> |
| Iron      | Cogswell 2003     | US                           | 513        | T   | <a href="https://pubmed.ncbi.nlm.nih.gov/14522736/">https://pubmed.ncbi.nlm.nih.gov/14522736/</a> |
| Iron      | Siega-Riz 2006    | US                           | 867        | T   | <a href="https://pubmed.ncbi.nlm.nih.gov/16458655/">https://pubmed.ncbi.nlm.nih.gov/16458655/</a> |
| Iron      | Gupta 2017        | US                           | 5316       | O   | <a href="https://pubmed.ncbi.nlm.nih.gov/29070559/">https://pubmed.ncbi.nlm.nih.gov/29070559/</a> |
| Iron      | Schmidt 2014      | US                           | 866        | O   | <a href="https://pubmed.ncbi.nlm.nih.gov/25249546/">https://pubmed.ncbi.nlm.nih.gov/25249546/</a> |
| Iron      | Krapels 2004      | Netherlands                  | 355        | O   | <a href="https://pubmed.ncbi.nlm.nih.gov/15514283/">https://pubmed.ncbi.nlm.nih.gov/15514283/</a> |
| Iron      | Chandler 2012     | US                           | 7222       | O   | <a href="https://pubmed.ncbi.nlm.nih.gov/22933447/">https://pubmed.ncbi.nlm.nih.gov/22933447/</a> |
| Iron      | Makrides 2003     | Australia                    | 430        | T   | <a href="https://pubmed.ncbi.nlm.nih.gov/12816784/">https://pubmed.ncbi.nlm.nih.gov/12816784/</a> |
| Iron      | Meier 2003        | US                           | 111        | T   | <a href="https://pubmed.ncbi.nlm.nih.gov/15931282/">https://pubmed.ncbi.nlm.nih.gov/15931282/</a> |
| Iron      | Preziosi 1997     | Niger                        | 197        | T   | <a href="https://pubmed.ncbi.nlm.nih.gov/9356536/">https://pubmed.ncbi.nlm.nih.gov/9356536/</a>   |
| Iron      | Kilbride 1999     | Jordan                       | 232        | O   | <a href="https://pubmed.ncbi.nlm.nih.gov/10405849/">https://pubmed.ncbi.nlm.nih.gov/10405849/</a> |
| Iron      | Scholl 2011       |                              |            | R   | <a href="https://pubmed.ncbi.nlm.nih.gov/22043878/">https://pubmed.ncbi.nlm.nih.gov/22043878/</a> |
| Iron      | Pena-Rosas 2009   |                              | 23200      | R   | <a href="https://pubmed.ncbi.nlm.nih.gov/19821332/">https://pubmed.ncbi.nlm.nih.gov/19821332/</a> |
| Iron      | Pena-Rosas 2015   |                              | 43274      | M   | <a href="https://pubmed.ncbi.nlm.nih.gov/26198451/">https://pubmed.ncbi.nlm.nih.gov/26198451/</a> |
| Magnesium | De Jorge 1965     | Brazil                       | 139        | O   | <a href="https://pubmed.ncbi.nlm.nih.gov/14268597/">https://pubmed.ncbi.nlm.nih.gov/14268597/</a> |
| Magnesium | Standley 1997     | US                           | 31         | O   | <a href="https://pubmed.ncbi.nlm.nih.gov/8990431/">https://pubmed.ncbi.nlm.nih.gov/8990431/</a>   |
| Magnesium | Hall 1957         | US                           | 324        | O   | <a href="https://pubmed.ncbi.nlm.nih.gov/13400427/">https://pubmed.ncbi.nlm.nih.gov/13400427/</a> |
| Magnesium | Arikan 1999       | Austria                      | 209        | O   | <a href="https://pubmed.ncbi.nlm.nih.gov/10640870/">https://pubmed.ncbi.nlm.nih.gov/10640870/</a> |
| Magnesium | Zarcone 1994      | Italy                        |            | T   | <a href="https://pubmed.ncbi.nlm.nih.gov/7603732/">https://pubmed.ncbi.nlm.nih.gov/7603732/</a>   |
| Magnesium | Jafrin 2014       | Bangladesh                   | 108        | O   | <a href="https://pubmed.ncbi.nlm.nih.gov/25481580/">https://pubmed.ncbi.nlm.nih.gov/25481580/</a> |
| Magnesium | Tayana 2013       | Iran                         | 500        | O   | <a href="https://pubmed.ncbi.nlm.nih.gov/24693379/">https://pubmed.ncbi.nlm.nih.gov/24693379/</a> |
| Magnesium | Enaruna 2013      | Nigeria                      | 160        | O   | <a href="https://pubmed.ncbi.nlm.nih.gov/23974737/">https://pubmed.ncbi.nlm.nih.gov/23974737/</a> |
| Magnesium | Uludag 2014       | Turkey                       | 100        | T   | <a href="https://pubmed.ncbi.nlm.nih.gov/24156667/">https://pubmed.ncbi.nlm.nih.gov/24156667/</a> |
| Magnesium | He 2016           |                              | 14 studies | M   | <a href="https://pubmed.ncbi.nlm.nih.gov/26930501/">https://pubmed.ncbi.nlm.nih.gov/26930501/</a> |
| Magnesium | Krapels 2004      | Netherlands                  | 355        | O   | <a href="https://pubmed.ncbi.nlm.nih.gov/15514283/">https://pubmed.ncbi.nlm.nih.gov/15514283/</a> |
| Magnesium | Markrides 2014    |                              | 9090       | M/T | <a href="https://pubmed.ncbi.nlm.nih.gov/24696187/">https://pubmed.ncbi.nlm.nih.gov/24696187/</a> |
| Magnesium | Harrison 2007     | South Africa                 | 4494       | T   | <a href="https://pubmed.ncbi.nlm.nih.gov/17578470/">https://pubmed.ncbi.nlm.nih.gov/17578470/</a> |

|            |                    |             |            |     |                                                                                                                                                                                                 |
|------------|--------------------|-------------|------------|-----|-------------------------------------------------------------------------------------------------------------------------------------------------------------------------------------------------|
| Magnesium  | D'Almeida 1992     | Angola      | 150        | T   | <a href="https://pubmed.ncbi.nlm.nih.gov/1492408/">https://pubmed.ncbi.nlm.nih.gov/1492408/</a>                                                                                                 |
| Magnesium  | Li 1997            | China       | 102        | T   | <a href="https://pubmed.ncbi.nlm.nih.gov/9642379/">https://pubmed.ncbi.nlm.nih.gov/9642379/</a>                                                                                                 |
| Magnesium  | Arikan 1997        | Austria     | 481        | T   | <a href="https://www-sciencedirect-com.ezproxy1.lib.asu.edu/science/article/pii/S0002937897801925">https://www-sciencedirect-com.ezproxy1.lib.asu.edu/science/article/pii/S0002937897801925</a> |
| Magnesium  | Zarcone 1994       | Italy       | 100        | T   | <a href="https://pubmed.ncbi.nlm.nih.gov/7603732/">https://pubmed.ncbi.nlm.nih.gov/7603732/</a>                                                                                                 |
| Magnesium  | Spatling 1998      | Switzerland | 568        | T   | <a href="https://pubmed.ncbi.nlm.nih.gov/3349001/">https://pubmed.ncbi.nlm.nih.gov/3349001/</a>                                                                                                 |
| Magnesium  | Kovacs 1998        | Germany     | 985        | T   | <a href="https://pubmed.ncbi.nlm.nih.gov/3063587/">https://pubmed.ncbi.nlm.nih.gov/3063587/</a>                                                                                                 |
| Magnesium  | Sibai 1989         | US          | 374        | T   | <a href="https://pubmed.ncbi.nlm.nih.gov/2665492/">https://pubmed.ncbi.nlm.nih.gov/2665492/</a>                                                                                                 |
| Magnesium  | Doyle 2009         |             | 6145       | M   | <a href="https://pubmed.ncbi.nlm.nih.gov/19160238/">https://pubmed.ncbi.nlm.nih.gov/19160238/</a>                                                                                               |
| Manganese  | Spencer 1999       | Australia   | 34         | O   | <a href="https://pubmed.ncbi.nlm.nih.gov/10501283/">https://pubmed.ncbi.nlm.nih.gov/10501283/</a>                                                                                               |
| Manganese  | Vigeh 2008         | Iran        | 410        | O   | <a href="https://pubmed.ncbi.nlm.nih.gov/18242051/">https://pubmed.ncbi.nlm.nih.gov/18242051/</a>                                                                                               |
| Manganese  | Zota 2009          | US          | 470        | O   | <a href="https://pubmed.ncbi.nlm.nih.gov/19289966/">https://pubmed.ncbi.nlm.nih.gov/19289966/</a>                                                                                               |
| Manganese  | Than 2009          | US          | 124        | O   | <a href="https://pubmed.ncbi.nlm.nih.gov/19900038/">https://pubmed.ncbi.nlm.nih.gov/19900038/</a>                                                                                               |
| Manganese  | Eum 2014           | Korea       | 331        | O   | <a href="https://pubmed.ncbi.nlm.nih.gov/24775401/">https://pubmed.ncbi.nlm.nih.gov/24775401/</a>                                                                                               |
| Manganese  | Mora 2015          | Costa Rica  | 380        | O   | <a href="https://pubmed.ncbi.nlm.nih.gov/25460620/">https://pubmed.ncbi.nlm.nih.gov/25460620/</a>                                                                                               |
| Manganese  | Jones 2010         | US          | 102        | O   | <a href="https://pubmed.ncbi.nlm.nih.gov/20553999/">https://pubmed.ncbi.nlm.nih.gov/20553999/</a>                                                                                               |
| Manganese  | Chung 2015         | Korea       | 232        | O   | <a href="https://pubmed.ncbi.nlm.nih.gov/25734517/">https://pubmed.ncbi.nlm.nih.gov/25734517/</a>                                                                                               |
| Manganese  | Lin 2013           | Taiwan      | 230        | O   | <a href="https://pubmed.ncbi.nlm.nih.gov/23578827/">https://pubmed.ncbi.nlm.nih.gov/23578827/</a>                                                                                               |
| Molybdenum | Waring 2000        | UK          | 300        | O   | <a href="https://www.tandfonline.com/doi/abs/10.1080/13590840050000861">https://www.tandfonline.com/doi/abs/10.1080/13590840050000861</a>                                                       |
| Molybdenum | Vazquez-Salas 2014 | Mexico      | 147        | O   | <a href="https://pubmed.ncbi.nlm.nih.gov/24479423/">https://pubmed.ncbi.nlm.nih.gov/24479423/</a>                                                                                               |
| Selenium   | Zachara 1993       | Poland      | 49         | O   | <a href="https://pubmed.ncbi.nlm.nih.gov/8449427/">https://pubmed.ncbi.nlm.nih.gov/8449427/</a>                                                                                                 |
| Selenium   | Rayman 2014        | UK          | 230        | T   | <a href="https://pubmed.ncbi.nlm.nih.gov/24708917/">https://pubmed.ncbi.nlm.nih.gov/24708917/</a>                                                                                               |
| Selenium   | Choi 2016          | Korea       | 245        | O   | <a href="https://pubmed.ncbi.nlm.nih.gov/27886083/">https://pubmed.ncbi.nlm.nih.gov/27886083/</a>                                                                                               |
| Selenium   | Varsi 2017         | Norway      | 272        | O   | <a href="https://pubmed.ncbi.nlm.nih.gov/28492511/">https://pubmed.ncbi.nlm.nih.gov/28492511/</a>                                                                                               |
| Selenium   | Kong 2016          | Global      | 569        | M   | <a href="https://pubmed.ncbi.nlm.nih.gov/27793207/">https://pubmed.ncbi.nlm.nih.gov/27793207/</a>                                                                                               |
| Selenium   | Mariath 2011       | Brazil      |            | R   | <a href="https://pubmed.ncbi.nlm.nih.gov/21338537/">https://pubmed.ncbi.nlm.nih.gov/21338537/</a>                                                                                               |
| Selenium   | Bro 1988           | Denmark     | 500        | O   | <a href="https://pubmed.ncbi.nlm.nih.gov/2980811/">https://pubmed.ncbi.nlm.nih.gov/2980811/</a>                                                                                                 |
| Selenium   | Rayman 2014        | UK          | 230        | O   | <a href="https://pubmed.ncbi.nlm.nih.gov/24708917/">https://pubmed.ncbi.nlm.nih.gov/24708917/</a>                                                                                               |
| Selenium   | Mokhber 2011       | Iran        | 169        | T   | <a href="https://pubmed.ncbi.nlm.nih.gov/20528216/">https://pubmed.ncbi.nlm.nih.gov/20528216/</a>                                                                                               |
| Selenium   | Negro 2007         | Italy       | 2143       | T   | <a href="https://pubmed.ncbi.nlm.nih.gov/17284630/">https://pubmed.ncbi.nlm.nih.gov/17284630/</a>                                                                                               |
| Zinc       | Hambidge 2017      | Guatemala   | 600        | O   | <a href="https://pubmed.ncbi.nlm.nih.gov/28424260/">https://pubmed.ncbi.nlm.nih.gov/28424260/</a>                                                                                               |
| Zinc       | Hunt 1983          | US          | 213        | T   | <a href="https://pubmed.ncbi.nlm.nih.gov/6837492/">https://pubmed.ncbi.nlm.nih.gov/6837492/</a>                                                                                                 |
| Zinc       | Goldenberg 1995    | US          | 580        | T   | <a href="https://pubmed.ncbi.nlm.nih.gov/7629954/">https://pubmed.ncbi.nlm.nih.gov/7629954/</a>                                                                                                 |
| Zinc       | Hambidge 1983      | US          | 46         | T   | <a href="https://pubmed.ncbi.nlm.nih.gov/6829485/">https://pubmed.ncbi.nlm.nih.gov/6829485/</a>                                                                                                 |
| Zinc       | Tamura 2000        | US          | 3448       | O   | <a href="https://pubmed.ncbi.nlm.nih.gov/10617954/">https://pubmed.ncbi.nlm.nih.gov/10617954/</a>                                                                                               |
| Zinc       | Xie 2001           | China       | 156        | T   |                                                                                                                                                                                                 |
| Zinc       | Huang 1999         | China       | 136        | O   | <a href="https://pubmed.ncbi.nlm.nih.gov/10433344/">https://pubmed.ncbi.nlm.nih.gov/10433344/</a>                                                                                               |
| Zinc       | Ilhan 2002         | Turkey      | 75         | O   | <a href="https://pubmed.ncbi.nlm.nih.gov/12270770/">https://pubmed.ncbi.nlm.nih.gov/12270770/</a>                                                                                               |
| Zinc       | Choi 2016          | Korea       | 245        | O   | <a href="https://pubmed.ncbi.nlm.nih.gov/27886083/">https://pubmed.ncbi.nlm.nih.gov/27886083/</a>                                                                                               |
| Zinc       | Ma 2015            | Global      | 1425       | M/O | <a href="https://pubmed.ncbi.nlm.nih.gov/26389947/">https://pubmed.ncbi.nlm.nih.gov/26389947/</a>                                                                                               |
| Zinc       | He 2016            | Global      | 14 studies | M   | <a href="https://pubmed.ncbi.nlm.nih.gov/26930501/">https://pubmed.ncbi.nlm.nih.gov/26930501/</a>                                                                                               |
| Zinc       | Beckhaus 2015      | Global      | 32 studies | M   | <a href="https://pubmed.ncbi.nlm.nih.gov/26296633/">https://pubmed.ncbi.nlm.nih.gov/26296633/</a>                                                                                               |
| Zinc       | Devereux 2006      | UK          | 1861       | O   | <a href="https://pubmed.ncbi.nlm.nih.gov/16763215/">https://pubmed.ncbi.nlm.nih.gov/16763215/</a>                                                                                               |
| Zinc       | Mukherjee 1984     |             | 450        | O   | <a href="https://pubmed.ncbi.nlm.nih.gov/6475821/">https://pubmed.ncbi.nlm.nih.gov/6475821/</a>                                                                                                 |
| Zinc       | Lazebnik 1988      | US          | 279        | O   | <a href="https://pubmed.ncbi.nlm.nih.gov/3337165/">https://pubmed.ncbi.nlm.nih.gov/3337165/</a>                                                                                                 |
| Zinc       | Hunt 1985          | US          | 138        | T   | <a href="https://pubmed.ncbi.nlm.nih.gov/4061343/">https://pubmed.ncbi.nlm.nih.gov/4061343/</a>                                                                                                 |
| Zinc       | Ota 2015           | Global      | 17000      | M   | <a href="https://pubmed.ncbi.nlm.nih.gov/25927101/">https://pubmed.ncbi.nlm.nih.gov/25927101/</a>                                                                                               |
| Zinc       | Tamura 2003        | US          | 355        | T   | <a href="https://pubmed.ncbi.nlm.nih.gov/12791632/">https://pubmed.ncbi.nlm.nih.gov/12791632/</a>                                                                                               |
| Zinc       | Darmstadt 2012     | Bangladesh  | 559        | T   | <a href="https://pubmed.ncbi.nlm.nih.gov/22189527/">https://pubmed.ncbi.nlm.nih.gov/22189527/</a>                                                                                               |
| Zinc       | Bowen 2015         | Global      | 145,028    | R   | <a href="https://pubmed.ncbi.nlm.nih.gov/26317533/">https://pubmed.ncbi.nlm.nih.gov/26317533/</a>                                                                                               |
| Zinc       | Xie 2001           | China       | 156        | T   |                                                                                                                                                                                                 |

Supplemental Table S1 gives additional information about the studies included. M represents a meta-analysis, R represents reviews, O represents observational study and T represents a treatment study.
